# A cascade of destabilizations: combining *Wolbachia* and Allee effects to eradicate insect pests

Julie C. Blackwood<sup>a</sup>, Roger Vargas Jr.<sup>a</sup> and Xavier Fauvergue<sup>\*b</sup>

<sup>a</sup>Department of Mathematics and Statistics, Williams College,  
Williamstown, MA 01267, USA

<sup>b</sup>ISA, UMR INRA CNRS, Université Nicé Côte d'Azur, 06903  
Sophia-Antipolis, France

\*Corresponding author: [xavier.fauvergue@sophia.inra.fr](mailto:xavier.fauvergue@sophia.inra.fr)

## Summary

1. The management of insect pests has long been dominated by the use chemical insecticides, with the aim of instantaneously killing enough individuals to limit their damage. To minimize unwanted consequences to the environment,

---

\*[xavier.fauvergue@sophia.inra.fr](mailto:xavier.fauvergue@sophia.inra.fr)

some more recent novel approaches propose biological controls that take advantage of intrinsic demographic processes to eliminate pest populations.

2. We address the feasibility of a novel pest management strategy based on the integration of *Wolbachia*-induced cytoplasmic incompatibility and the enhancement of a pre-existing Allee effect via mating disruption.
3. A stochastic population model is developed that accounts for *Wolbachia*-induced cytoplasmic incompatibilities in addition to an Allee effect that arises from mating failures at low population density. Simulations were run with two objectives: quantifying how cytoplasmic incompatibility and the Allee effect interact to drive insect pest populations toward extinction, and delineating a strategy based on the introduction of *Wolbachia*-infected insects into a population where a mate-finding Allee effect is enhanced by mating disruption.
4. Our modeling results demonstrate that *Wolbachia*-induced cytoplasmic incompatibility and the Allee effect act independently from one another; the Allee effect does not modify the *Wolbachia*-invasion threshold, and cytoplasmic incompatibility has only a marginal effect on the Allee threshold. Nonetheless, when induced in concert, the two processes can drive even large populations to extinction. Importantly, simulations with successive introductions of two incompatible *Wolbachia* strains into a population where an Allee effect is enhanced by a realistic application of mating disruption suggest that even large pest populations could be driven to extinction.
5. Our study provides novel and tangible perspectives for the use of cytoplasmic

incompatibility and the Allee effect to eradicate insect pests. More generally, it points on the importance of transient dynamics, and the relevance of manipulating a cascade of destabilizations for pest management. . . .

## Keywords

Allee effect; biological control; cytoplasmic incompatibility; eradication; extinction; mating disruption; transient dynamics; *Wolbachia*.

## Introduction

1 With one million species and thirty billion tons of accumulated biomass, insects  
2 are far more diverse and abundant than any other form of animal life on Earth  
3 (Price *et al.* (2011)). Although most species provide crucial ecosystem services  
4 (Losey & Vaughan (2006)), a minority of taxa that we consider pests (1%) have  
5 an overwhelming influence on the development of population management in the-  
6 ory and in practice. Chemical insecticides have been used extensively since the  
7 1950s, but growing concerns about their negative side effects combined with the  
8 widespread emergence of insect resistance urges scientists to search for sustainable  
9 alternatives.

10 Among the various environmentally friendly approaches that have been envis-  
11 aged to control insect pests, a novel research avenue proposes the exploitation of  
12 Allee effects, i.e., the decrease in survival and reproduction at small population  
13 sizes and the consequent reduction in population growth (Liebhold & Bascompte  
14 (2003); Liebhold & Tobin (2008)). The central ideas surrounding these meth-

15 ods are twofold: management tactics could be combined in order to (1) reduce  
16 a population size down below the Allee threshold – the population size at which  
17 the *per capita* growth rate decreases (a “weak” Allee effect) or becomes negative  
18 (a “strong” Allee effect) – which, in turn, increases the probability of stochastic  
19 extinction, and/or (2) amplify the mechanisms underpinning a pre-existing Allee  
20 effect to increase the Allee threshold itself (Liebhold *et al.* (2016); Tobin, Berc &  
21 Liebhold (2011); Suckling *et al.* (2012)). Capitalizing on Allee effects to manage  
22 undesirable species is especially advantageous because it drives populations into  
23 extinction vortexes without needing to kill every individual; the Allee effect could  
24 thus be a cornerstone of eradication programs (Liebhold *et al.* (2016)).

25 The seminal idea of using Allee effects to eradicate insect pests and the sub-  
26 sequent development of theoretical models originate from basic research on, and  
27 population of management of, the Gypsy moth *Lymantria dispar*. The damage  
28 caused by this invasive forest pest in North America triggered a major contain-  
29 ment program to slow its spread toward the western states (Sharov *et al.* (2002);  
30 Liebhold, Halverson & Elmes (1992)). *L. dispar* is one of the few insect species  
31 for which both a component (mate-finding) and a demographic Allee effect have  
32 been explicitly identified (Tobin, Onufrieva & Thorpe (2013); Tobin *et al.* (2007);  
33 Johnson *et al.* (2006)). Mating disruption is thus one of the main tactics deployed  
34 to control newly established populations along the invasion front, with more ef-  
35 ficiency than classic treatments with the pesticide *Bacillus thurengiensis* (Sharov  
36 *et al.* (2002)). Therefore, there is a need to identify other invasive pest species that  
37 may have pre-existing Allee effects and determine when environmentally friendly  
38 forms of control may be effective.

39 The use of Allee effects to eradicate pests has been the focus of several recent

40 theoretical developments (e.g. Boukal & Berec (2009); Liebhold & Bascompte  
41 (2003); Blackwood *et al.* (2012); Yamanaka & Liebhold (2009)). Models have been  
42 developed to integrate one or more component Allee effects and include population  
43 management tactics such as culling, release of sterile males, and mating disruption  
44 (Fauvergue (2013)) provides a comprehensive review). For example, the model of  
45 Blackwood *et al.* 2012 assumes a mate-finding Allee effect and predicts that apply-  
46 ing moderate levels of insecticides in conjunction with mating disruption increases  
47 the demographic Allee threshold below which the *per capita* rate of increase be-  
48 comes negative. The two tactics act in synergy, decreasing the time to eradication  
49 below the time for either tactic alone.

50 There is evidence population management strategies centered on taking advan-  
51 tage of Allee effects may be plausible in many insect species. In a meta-analysis  
52 focused on natural animal populations (Kramer *et al.* (2009)), terrestrial arthro-  
53 pods were found associated with the largest number of studies (22) and the highest  
54 proportion (77%) showing an Allee effect. Mating failure at low density appeared  
55 as the most frequent mechanism. Additionally, Fauvergue (2013) found evidence  
56 supporting the presence of mate-finding Allee effects in 19 out of 32 published  
57 studies. Indirectly, the central role of Allee effects in insect population dynamics  
58 is supported by the efficiency of eradication programs based on the disruption of  
59 reproduction. Pest management based on the reduction of mating success via mass  
60 trapping, mating disruption with sex pheromones, or the release of sterile males  
61 has indeed proved successful in several instances (Suckling *et al.* (2014, 2012);  
62 Krafur (1998)).

63 In this article, we investigate *Wolbachia*-induced cytoplasmic incompatibility  
64 (CI) as a novel method for triggering reproductive failures and thereby increasing

65 pushing populations below pre-existing mate-finding Allee effects. *Wolbachia* are  
66 endosymbiotic bacteria that infect at least 20% of all insect species and up to two  
67 thirds in some estimations (Hilgenboecker *et al.* (2008)). It has various effects  
68 on its insect hosts, the most widespread and prominent being cytoplasmic incom-  
69 patibly (Stouthamer, Breeuwer & Hurst (1999)). Under CI, matings involving an  
70 infected male result in offspring mortality during embryonic development if the  
71 female is either uninfected or infected with a different incompatible strain. Fitness  
72 advantages of infected females and maternal inheritance provide key features un-  
73 derlying the spread of *Wolbachia* within a population: above a threshold frequency,  
74 a given *Wolbachia* strain is expected to invade until near-fixation (Barton & Turelli  
75 (2011); Hancock, Sinkins & Godfray (2011); Caspari & Watson (1959); Hoffmann  
76 & Turelli (1997); Turelli & Hoffmann (1991)). The introduction of cytoplasmic  
77 incompatibility within a population therefore promotes the release of individuals  
78 infected with *Wolbachia* as a candidate biological control agent against Arthropod  
79 pests (Bourtzis (2008)).

80 There are two different implementations of these techniques that can be con-  
81 sidered in practice. First, similar to the use of “Sterile Insect Technique” (SIT),  
82 males bearing a *Wolbachia* strain incompatible with that of the target population  
83 can be released in large numbers, leading to CI and a consequent decrease in popu-  
84 lation growth rate, possibly driving populations to local extinction (Laven (1967);  
85 Zabalou *et al.* (2004); Atyame *et al.* (2015)). Incompatible males can be obtained  
86 via transfection, even between completely different species of host insects (e.g.  
87 Braig *et al.* (1994)). At the population level, the underpinnings for mass-releases  
88 of incompatible males do not depart from that of SIT, for which interactions with  
89 the Allee effect have already been thoroughly analyzed (Boukal & Berec (2009);

90 Yamanaka & Liebhold (2009); Fauvergue (2013)).

91       The second management tactic using CI relies on the inoculation of a relatively  
92 small number of insects of both sex infected with a *Wolbachia* strain incompatible  
93 with that of the target population. This method is investigated in the theoretical  
94 model introduced in Dobson *et al.* (2002), which combines *Wolbachia* invasions  
95 with insect population dynamics and predicts a transient reduction in insect pop-  
96 ulation size. This decline results from the temporary increase in the fraction of  
97 incompatible matings, which peak in the midst of the invasion process. Hence,  
98 fine-tuned sequential introductions of different *Wolbachia* strains could be applied  
99 to sustain artificially an unstable coexistence of multiple incompatible infections  
100 within an insect population, allowing the population size to be reduced and main-  
101 tained at low level (Dobson, Fox & Jiggins (2002)).

102       Our aim is to determine the potential for *Wolbachia*-induced CI to drive a  
103 population to extinction in the presence of the Allee effect. Specifically, we derive  
104 a theoretical model built upon Dobson *et al.*'s (2002) approach of CI management  
105 that additionally accounts for Allee effects and environmental and demographic  
106 stochasticity. We also consider mating disruption in our model as a potential  
107 complementary tactic. We use this model to address three primary questions: (1)  
108 What is the influence of Allee effects present within a host population on *Wolbachia*  
109 invasion dynamics? (2) What is the influence of cytoplasmic incompatibility on the  
110 demographic Allee effect? (3) What is the influence of a combination of *Wolbachia*-  
111 induced CI, mating disruption, Allee effects, and stochasticity on the probability  
112 of host extinction?

## 113 **Methods**

### 114 **Population model**

115 In this section, we first introduce a model that considers the population dynamics  
116 in the absence of individuals infected with *Wolbachia*. Our model extends the  
117 modeling framework introduced by Dobson, Fox & Jiggins (2002) by additionally  
118 accounting for pre-existing Allee effects, the release of pheromone sources as a  
119 method of mating disruption, as well as both demographic and environmental  
120 stochasticity.

121 Similar to Dobson, Fox & Jiggins (2002), we considered populations such that  
122 the dynamics can be modeled in discrete time with non-overlapping generations.  
123 The model explicitly tracks the total population size at each time  $t$ , given by  
124  $N_t$ , and also tracks the distribution of infected and uninfected individuals within  
125 the population. We assume that each time step can be broken into two stages:  
126 the first (at time  $t + 0.5$ ) captures reproduction, and the second (at time  $t + 1$ )  
127 captures density dependent survivorship of offspring to adults. The total number  
128 of offspring is given by

$$N_{t+0.5} = mN_t f(N_t) g(N_t), \quad (1)$$

129 where  $m$  is the maximum *per capita* fecundity.  $f(N_t)$  captures a component Allee  
130 effect that results from the failure to find mates at low densities such that



$$f(N_t) = \frac{N_t}{N_t + \theta}. \quad (2)$$

131 Here,  $\theta$  measures the strength of the Allee effect; a convenient interpretation of  
132 this term is that  $\theta$  represents the population size at which half of the females  
133 successfully mate. Further,  $g(N_t)$  in Equation 1 captures the decline in fecundity  
134 resulting from techniques to control populations via mating disruption. We assume  
135 that  $P$  pheromone sources are maintained within the population; given that there  
136 are  $F_t$  females in the population, only a fraction  $F_t/(F_t + S)$  males successfully  
137 find a mate (Fauvergue (2013)). We assume a 50:50 sex ratio (i.e.  $F = N_t/2$ ) so  
138 that

$$g(N_t) = \frac{N_t}{N_t + 2P} \quad (3)$$

139 Finally, we assume that survivorship of offspring to adults is density dependent so  
140 that

$$N_{t+1} = N_{t+0.5} S_N \quad (4)$$

141 where

$$S_N = \frac{S_0}{1 + (\alpha N_{t+0.5})^\gamma} \quad (5)$$

142 where the constant  $\alpha$  is related to the carrying capacity,  $\gamma$  is related to intraspecific  
143 competition, and  $S_0$  is survivorship in the absence of intraspecific competition  
144 (Slatkin & Smith (1979)).

145 This modeling framework allows us to analytically determine the equilibrium  
146 values of carrying capacity  $K$  as well as the Allee threshold. Equilibrium values in  
147 discrete time models occur when  $N_{t+1} = N_t$ , and the equilibria  $N^*$  of our model  
148 are given by the roots of the polynomial

$$\lambda\alpha(N^*)^2 + (1 - \lambda S_0)N^* + \theta = 0. \quad (6)$$

149 This expression is used to analytically determine the carrying capacity as used in  
150 Figures 1, 3, 4, and 5.

151 We build in environmental and demographic stochasticity based on this de-  
152 terministic framework. Using methods similar to Schoener *et al.* (2003) and Mel-  
153 bourne & Hastings (2008), we first account for environmental stochasticity by  
154 rewriting Equation 1 as

$$N_{t+0.5} = m_e N_t f(N_t) g(N_t), \quad (7)$$

155 where the fecundity  $m_e$  is drawn at each generation from a normal distribution  
156 with mean  $m$  and a standard deviation  $\sigma$ . We also imposed the restriction that  
157  $m_e \geq 0$ . Although we imposed this restriction, however, we note that the proba-  
158 bility that of choosing a negative value is less than  $10^{-6}$  as a result of the relatively

159 high fecundity. Therefore, the normal distribution is a reasonable choice to model  
160 environmental stochasticity.

161 Next, we included demographic stochasticity in two ways: in fecundity and in  
162 density dependent survivorship. Note that the total number of individuals that  
163 successfully reproduce is given by

$$B = N_t f(N_t) g(N_t). \quad (8)$$

164 We assume that each of these individuals at a given time  $t$  reproduces with  
165 fecundity  $m_e$  (as described above), and the total number of eggs produced is a  
166 Poisson random variable. Since the sum of independent Poisson random variables  
167 is also a Poisson random variable, the total offspring of all adults at is

$$N_{t+0.5} \sim \text{Poisson}(m_e B) \quad (9)$$

168 Finally, we include demographic stochasticity in density dependent survivor-  
169 ship. Given that  $S_N$  (as defined in Equation 5) is the probability that offspring  
170 survive to adults, we assume that survivorship is a binomially distributed so that

$$N_{t+1} \sim \text{Binomial}(N_{t+0.5}, S_N). \quad (10)$$

## 171 Infection dynamics

172 We consider the infection dynamics of up to two different cytotypes of *Wolbachia*  
173 (referred to as cytotypes  $X$  and  $Y$ ) and denote the number of uninfected individuals  
174 as  $W$ . Note that all variables and parameters with subscripts  $X$  (or  $Y$ ) are related  
175 to cytotype  $X$  (or  $Y$ ). Note that the infection dynamics have the same assumptions  
176 as Dobson, Fox & Jiggins (2002).

177 In the presence of a single cytotype of *Wolbachia*, there are only unidirectional  
178 cytoplasmic incompatibilities (CI); in contrast, in the presence of multiple cyto-  
179 types there may be bi-directional CI. Therefore, we first introduce the case of a  
180 single cytotype and then modify the model to include two cytotypes.

181

### 182 *One cytotype*

183 To capture the *Wolbachia* dynamics, we first determine the proportions of  
184 infected and uninfected individuals in our population at time  $t$ . For example, if  
185 there are  $W_t$  uninfected individuals and  $X_t$  infected with cytotype  $X$  then, under  
186 the assumption that there is a 50:50 sex ratio, the fraction of females infected with  
187 cytotype  $X$  at  $t + 0.5$  is given by

$$a_t = \frac{X_t}{W_t + X_t},$$

188 Similarly, we find the fraction  $i_t$  of all males are infected (where  $i_t = a_t$ ),  
189 the fraction  $q_t$  of all males are uninfected, and the fraction  $c_t$  of all females are  
190 uninfected (again note that  $q_t = c_t$ ).

191 Based on the proportions of uninfected and infected populations, we can now

192 determine the fraction of offspring that are infected. Crosses between pairs with  
193 at least one infected individual suffer a fecundity loss due to infection ( $1 - F_X$ ).  
194 Vertical transmission of *Wolbachia* occurs maternally and we assume that trans-  
195 mission is successful with probability  $\mu_X$ . The proportion of viable offspring that  
196 are infected with cytotype  $X$  after reproduction (i.e. at time  $t + 0.5$ ) is therefore  
197 given by

$$X_{t+0.5} = a_t(1 - \mu_X)F_X(i_t + q_t) \quad (11)$$

198 Second, we can identify the proportion of viable offspring that are uninfected  
199 ( $W_{t+0.5}$ ). Uninfected individuals can arise from crosses both uninfected females  
200 and males. Further, matings between both infected females and males can have  
201 viable uninfected offspring. This results from failure to transmit *Wolbachia* to  
202 their offspring (i.e. with probability  $\mu_X$ ). When one type of *Wolbachia* is present  
203 within a population, then only unidirectional cytoplasmic incompatibility (CI) is  
204 possible. This type of CI occurs through matings between infected males and  
205 uninfected females. Therefore, we assume that pairings between infected males  
206 and uninfected females undergo CI and a fraction  $H_X$  survives. The proportion  
207 of viable offspring that are not infected with *Wolbachia* following reproduction is  
208 given by

$$W_{t+0.5} = (\mu_X F_X a_t + c_t) \times (i_t H_X + q_t) \quad (12)$$

209 Notice that due to cytoplasmic incompatibilities and the fecundity cost due to  
210 infection with *Wolbachia*, the fraction of the total population that successfully  
211 reproduces ( $X_{t+0.5} + W_{t+0.5}$ ) is less than one. Therefore, the total number of  
212 offspring as governed by Equation 1 can be rewritten as

$$N_{t+0.5} = m (X_{t+0.5} + W_{t+0.5}) N_t g(N_t) f(N_t). \quad (13)$$

213 In other words, the product  $g(N_t)f(N_t)$  captures the total fraction of adults at  
214 time  $t$  who successfully find a mate, and the sum  $X_{t+0.5} + W_{t+0.5}$  is the fraction of  
215 all offspring that are viable. Finally, as described in the previous section, density  
216 dependent mortality limits the total number of adults at time  $t$  (Equation 5).

217

### 218 *Two cytotypes*

219 When two cytotypes of *Wolbachia* are present within a population, bidirectional  
220 CI occurs when a male with one cytype mates with a female infected with an  
221 incompatible *Wolbachia* cytype. Similar to the previous section, we assume that  
222 a fraction  $H_X$  (or  $H_Y$ , depending on the infection type of the male and female)  
223 survives.

224 Therefore, in the presence of two strains we rewrite Equation 11 as

$$X_{t+0.5} = a_t (1 - \mu_X) F_X (i_t + j_t H_Y + q_t) \quad (14)$$

225 where  $j_t$  is the fraction of males infected with cytype  $Y$  and  $b_t$  is the fraction

226 of females infected with cytotype  $Y$ . Similarly, the proportion of viable offspring  
227 infected with cytotype  $Y$  following reproduction is given by

$$Y_{t+0.5} = b_t (1 - \mu_Y) F_Y (i_t H_X + j_t + q_t). \quad (15)$$

228 The proportion of viable uninfected offspring is now given by

$$W_{t+0.5} = (\mu_X F_X a_t + \mu_Y F_Y b_t + c_t) \times (i_t H_X + j_t H_Y + q_t) \quad (16)$$

229 For simplicity, we assume that fecundity loss, transmission failure, and survival  
230 of CI are equal between cytotypes.

## 231 Results

232 In the following sections we first test our model against well-established results  
233 related to *Wolbachia* invasion as a method of model validation, establish the re-  
234 lationship between *Wolbachia* and the location of the Allee threshold, and finally  
235 evaluate the potential for the release of infected insects to control a population.

### 236 Model validation

237 We first determine whether our model captures the same features of the important  
238 earlier work (Hoffmann, Turelli & Harshman (1990); Turelli & Hoffmann (1991);  
239 Hancock, Sinkins & Godfray (2011)). Hoffmann *et al.* (1990) derived an analytic

240 expression for the expected equilibrium infection frequencies. After adjusting their  
241 notation to match ours and simplifying, the equilibrium infection frequency for a  
242 single cytotype of *Wolbachia X* should be the roots of

$$(1 - H_X) * (1 - \mu_X F_X) p^2 + (F_X + H_X - 2) p + 1 - F_X (1 - \mu_X) = 0.$$

243 Their work predicts that there is an unstable equilibrium, below which invasion  
244 is unsuccessful and above which invasion is successful. This equilibrium is therefore  
245 referred to as the invasion threshold. Initial infection frequencies above this value  
246 will increase until reaching the higher stable equilibrium that indicates a successful  
247 invasion.

248 Using similar methods to Charlat *et al.* (2005), Figure 1A displays the infection  
249 frequency at generation  $t + 1$  as a function of the frequency at generation  $t$  (blue  
250 curve). Specifically, we compute the infection frequency between two subsequent  
251 generations with generation  $t$  on the horizontal axis and generation  $t + 1$  on the  
252 vertical axis. Therefore, if the blue curve lies above the line  $y = x$ , then the  
253 infection frequency is decreasing. Similarly, if the dashed curve lies below the line  
254  $y = x$ , then the infection frequency is increasing. The intersections of the black  
255 line and the blue curve indicate the equilibria, and the horizontal dashed lines  
256 display the analytically derived results of Hoffmann, Turelli & Harshman (1990).  
257 Unless otherwise stated, all parameters used are listed in Table 1. As evidenced  
258 by the figure, our simulation results is consistent with the analytically derived  
259 equilibrium infection frequencies.

260 Since our aim is to determine the interaction between Allee effects and *Wol-*



261 *bachia* invasion, we also determine whether the invasion threshold varies with the  
262 strength of the Allee effect  $\theta$ . Using the same methods as used in finding the in-  
263 vasion threshold in Figure 1A, we identify the threshold as  $\theta$  varies. As displayed  
264 in Figure 1B, the invasion threshold does not change. Additionally, the invasion  
265 threshold is not effected by the parameter  $S_0$  (results not shown).

## 266 **The effect of *Wolbachia* on the Allee threshold**

267 To determine the dynamical effects of the presence of *Wolbachia* infection within a  
268 population, we find the Allee threshold both in the presence and absence of infec-  
269 tion. In this section, we ignore stochasticity as well as the release of pheromones  
270 ( $S = 0$ ). The Allee threshold at a given population size is found by calculating the  
271 reproductive rate between two consecutive generations (i.e.  $N_{t+1}/N_t$ ). Because our  
272 model is in discrete time, reproductive rates above one result in positive growth,  
273 whereas population growth rates below one correspond to a declining population.

274 Figure 2A displays the probability of mating as determined by the strength of  
275 the Allee effect. We considered both a weak Allee effect – the population reproduc-  
276 tive rate declines at low densities – (displayed in black) and a strong Allee effect  
277 – the population growth rate drops below one at low densities (displayed in red).  
278 In Figure 2B, the solid lines display the reproductive rates in the absence of *Wol-*  
279 *bachia*-infected individuals. The intersection of these curves with the horizontal  
280 black line indicate equilibria, or

$$N_{t+1} = N_t. \tag{17}$$

281 As stated above, the black curve represents a weak Allee effect such that the  
282 only equilibrium is the carrying capacity, whereas the red curve has two equilibria:  
283 the first indicating the Allee threshold and the second is the carrying capacity.

284 In Figure 2B, the dashed and dash-dotted curves represent the reproductive  
285 rates of the population when the population size is comprised of 10% and 50%,  
286 respectively, infected individuals. These values are above the invasion thresh-  
287 old; therefore, this figure captures the dynamics during the replacement process  
288 when the population contains the specified distribution of infected and uninfected  
289 individuals. As a consequence of cytoplasmic incompatibilities, the maximum re-  
290 productive rate for both values of  $\theta$  drops. However, although there is an increase  
291 in the Allee threshold in the case of strong Allee effects, the increase is relatively  
292 small. Interestingly, when the population is comprised of 50% *Wolbachia*-infected  
293 individuals, the invasion causes a large enough decrease in reproductive rate that  
294 it creates a strong, rather than weak, Allee effect. Although the Allee threshold  
295 is very small, it is an interesting result to consider especially in the contest of  
296 invasion management.

## 297 **Implications for population management**

### 298 *Deterministic predictions*

299 In this section, we directly characterize implications for population manage-  
300 ment through the release of infected individuals. As observed by Dobson, Fox  
301 & Jiggins (2002), there is a transient decline in the population size during the  
302 replacement of uninfected hosts by *Wolbachia*-infected individuals. Therefore, we  
303 first find the magnitude of this decline in the presence of Allee effects to deter-

304 mine the conditions under which the replacement process brings the population  
305 size below the Allee threshold, thereby forcing extinction.

306 To ensure that the introduction size is above the invasion threshold, in all  
307 simulations we assume that the introduction is large enough so that the infection  
308 frequency is 10%. This value lies just above the actual threshold of  $\sim 9\%$ . There-  
309 fore, the number of infected individuals introduced directly depends on the current  
310 host population size. When a single release is considered, we always assume that  
311 the release occurs in the first generation. When a second cytotype is released, we  
312 assume it occurs five generations after the initial release.

313 Initially, we consider the dynamics in the absence of stochasticity (Figure 3).  
314 Figure 3A-B displays the minimum population size relative to  $K$  during the re-  
315 placement process following one and two releases, respectively. Notice that values  
316 of zero for the minimal population size indicate that the transient reduction in  
317 population size brought the population below the Allee threshold, therefore lead-  
318 ing to deterministic extinction. To determine the success of the releases under  
319 varying reproductive rates, we replicated the results for four different values of  
320  $S_0$ . We observe that for all reproductive rates, releases of individuals infected  
321 with different cytotypes of *Wolbachia* leads to greater success of these methods.  
322 Importantly, we also find that the effectiveness of control via releases of infected  
323 individuals critically depends on the reproductive rate of a population: for low  
324 reproductive rates, even a single release is often capable of driving a population  
325 to extinction. In contrast, however, populations with relatively high reproductive  
326 rates are only driven to extinction with unrealistically strong Allee effects. For  
327 example, if  $S_0 = 0.15$ , a value of  $\theta$  that is close to half of the carrying capacity is  
328 required for extinction to occur (Figure 3B).

329 While pest management through *Wolbachia* may be independently effective  
330 for species with relatively low reproductive rates, complementary tactics may be  
331 required when reproductive rates are high. Specifically, a tactic that either de-  
332 creases the population size or further increases the Allee threshold may amplify  
333 the effects of *Wolbachia* introductions. Therefore, we consider the use of mating  
334 disruption through the release of pheromones ( $P$ ) as a supplemental management  
335 tactic (see Equations 3 and 1). Because there is greater uncertainty surrounding  
336 the effectiveness of *Wolbachia* introductions in bringing pest populations to extinc-  
337 tion, hereafter we use a relatively high reproductive rate ( $S_0 = 0.15$ ). In Figure  
338 3C, we fix the strength of the Allee effect relative to  $K$  at a value that is likely  
339 biologically reasonable ( $\theta/K = 0.1$ ), and determine the minimum population size  
340 as the number of pheromone sources is varied. The solid curve displays the results  
341 in the absence of a release of *Wolbachia*-infected individuals, whereas the dotted  
342 and dashed-dotted curves display the results when one and two, respectively, cy-  
343 totypes are released. Note that in the absence of pheromones, releases of infected  
344 individuals does not bring the population size below the Allee threshold (Figure  
345 3AB). In contrast, combining both methods is significantly more effective than  
346 either tactic alone.

347

### 348 *Stochastic predictions*

349 The analysis in the previous section was centered on the deterministic outcome  
350 of population management strategies in the presence of Allee effects. Addition-  
351 ally, Figure 3 evaluates the success of releases of *Wolbachia*-infected individuals  
352 as well as techniques centered directly on mating disruption when a population  
353 begins at its carrying capacity. However, we did not consider the interaction of

354 Allee effects and stochasticity which can be especially important at low popula-  
355 tion sizes. Therefore, in this section we determine the ability of *Wolbachia* and  
356 mating disruption to drive population sizes with variable initial population sizes  
357 to extinction in the presence of Allee effects and stochasticity. As in Figure 3C, we  
358 implement a reproductive rate that is relatively high and releases of *Wolbachia*-  
359 infected individuals does not guarantee population extinction in the deterministic  
360 setting.

361 We find the probability of extinction based on 500 realizations of the stochas-  
362 tic model (i.e. Equations 7-10) for each relevant parameter combination of initial  
363 population size and strength of the Allee effect. To determine the relative roles of  
364 environmental and demographic stochasticity, we simulate the model while includ-  
365 ing both types of stochasticity (bottom row of Figure 4) as well as demographic  
366 stochasticity alone (top row of Figure 4). Further, we find the extinction probabili-  
367 ty under three scenarios: no introduction of *Wolbachia*-infected individuals, one  
368 introduction, and two introductions (each implemented as in Figure 3).

369 Similar to the deterministic results, we find that introducing two cytotypes  
370 of *Wolbachia* is more effective than one (Figure 4). However, as also noted in  
371 the deterministic results, the strength of the Allee effect ( $\theta$ ) required to force  
372 extinction is very high. Therefore, combining *Wolbachia* introductions with other  
373 methods that increase the Allee threshold (e.g. mating disruption) are critical  
374 for management success. Interestingly, local extinction is possible for large initial  
375 population sizes – including those at carrying capacity – for very strong Allee  
376 effects.

377 While there is little difference in whether both demographic and environmental  
378 stochasticity are simultaneously included in the model, environmental stochastic-

379 ity may increase the uncertainty of local extinction near the boundary between  
380 extinction and population survival. Moreover, when the strength of the Allee ef-  
381 fect is high, demographic stochasticity does not increase extinction probability  
382 significantly as compared to the deterministic setting (e.g. Figure 3). This result  
383 follows from the relatively large initial population sizes near the Allee threshold  
384 when  $\theta$  is large.

385 Our finding that the value of  $\theta$  (strength of the Allee effect) required for popula-  
386 tion extinction in the deterministic setting is echoed in the stochastic simulations.  
387 This again highlights that the release of individuals infected with *Wolbachia* might  
388 be the most successful when combined with another tactic. Therefore, as in Figure  
389 3C, we fix  $\theta$  relative to  $K$  at a more realistic value of 0.1 and consider the dynamics  
390 with mating disruption only as well as mating disruption with the addition with  
391 one and two strains of *Wolbachia*. As shown in Figure 5, utilizing both mating  
392 disruption and CI is much more effective than using mating disruption alone. Ad-  
393 ditionally, it is important to note that when  $\theta/K$  is fixed at 0.1, releases of infected  
394 individuals in the absence of mating disruption has little effect on the extinction  
395 probability. Therefore, these two methods can serve as complementary tactics for  
396 pest management.

## 397 Discussion

398 We investigated a population management strategy that considers *Wolbachia*-  
399 induced cytoplasmic incompatibility in the presence of Allee effects. In particular,  
400 we developed a stochastic population model, building upon the seminal approach  
401 of Dobson *et al.* (Dobson2002) and emerging ideas on the use of Allee effects for

402 the eradication of pest species (Liebhold & Bascompte (2003); Tobin, Berec &  
403 Liebhold (2011); Liebhold *et al.* (2016)). Our model demonstrates that the intro-  
404 duction of a small number of incompatible individuals into a pest population that  
405 has a strong pre-existing Allee effect can drive the pest population to extinction  
406 with no further intervention. We also demonstrate that extinction is possible for  
407 surprisingly large pest populations, and that combinations of more than one strain  
408 of *Wolbachia* and mating disruption via sex pheromones greatly increases the pop-  
409 ulation's extinction risk. Our study thus unveils promising research avenues on  
410 a novel environmentally-friendly and elegant pest management strategy based on  
411 the sole manipulation of intrinsic population processes.

412 An important component of our modeling work was to uncover the basic inter-  
413 actions between Allee effects and cytoplasmic incompatibility (CI). We show that  
414 the interactions between Allee effects and CI are weak or non-existent: the inva-  
415 sion threshold does not depend on the strength of the Allee effect, and the Allee  
416 threshold has a marginal decrease in the presence of CI in the host population.  
417 Therefore, invasion of a particular *Wolbachia* strain into a population only depends  
418 on the threshold population size (or infection frequency) above which invasion be-  
419 gins in a deterministic setting (Barton & Turelli (2011)). This invasion threshold  
420 corresponds to a proportion of infected hosts above which infection spreads up  
421 to almost fixation, and is determined by parameters such as the reduction in egg  
422 hatch-rate caused by CI, the fitness costs of *Wolbachia* carriage, and the fraction  
423 of offspring that inherit the bacteria from an infected mother (Turelli (1994)). The  
424 invasion threshold found with our simulation model is consistent with that derived  
425 analytically (Turelli & Hoffmann (1991)), and unaffected by the intensity of a  
426 mate-finding Allee effect (Fig. 1B). In addition to adding validation to our model,

427 this also result holds interest because most theoretical approaches of *Wolbachia*  
428 invasion dynamics are purely genetic and consider changes in invasion frequency  
429 without considering host population dynamics. Our result follows that of Hancock  
430 *et al* (2011) in suggesting that *Wolbachia* invasion thresholds predicted analyti-  
431 cally hold for closed populations, even when, as assumed here, host reproductive  
432 rate is affected by two opposite forms of density dependence.

433 In the context of strong Allee effects, the Allee threshold is the unstable equi-  
434 librium corresponding to the population size below which the population growth  
435 rate becomes negative (Wang & Kot (2001); BOUKAL & BEREK (2002); DeRe-  
436 DeC & COuRCHAmP (2007)). A population below the Allee threshold is therefore  
437 doomed to deterministic extinction, making the Allee effect a central paradigm for  
438 conservation (DeReDeC & COuRCHAmP (2007); Stephens & Sutherland (1999)),  
439 invasions (Taylor & Hastings (2005)), biological control introduction (Fauvergue  
440 *et al.* (2007, 2012)), and as hypothesized in the present work, eradication (Tobin,  
441 Berec & Liebhold (2011)). Whether an Allee effect is weak or strong, and in the  
442 latter case, the value of the Allee threshold depends on the strength of the un-  
443 derlying component Allee effect(s) relative to other density-dependent processes.  
444 Our simulations of various levels of cytoplasmic incompatibilities in a population  
445 with a mate finding Allee effect suggest that the Allee threshold itself is much less  
446 sensitive to extreme variations in CI (0-50% infected individuals), than it is to  
447 variations the mate-finding Allee effect (Fig. 2B). *Wolbachia*-induced cytoplasmic  
448 incompatibility does decrease population growth rate, as expected, but it has a  
449 minimal effect on the extinction threshold. Hence, *Wolbachia*-induced CI may be  
450 considered as a culling population management tactic, whereby population size is  
451 temporarily decreased as a result of cytoplasmic incompatibilities (Dobson, Fox &



452 Jiggins (2002)).

453 Despite their apparent independence, cytoplasmic incompatibility and the Allee  
454 effect yield very interesting emerging properties when acting in concert within tran-  
455 sient dynamics that are triggered by the invasion of a new *Wolbachia* strain into  
456 an uninfected host population. Our first analysis that considered the combined  
457 occurrence of Allee effects and CI in a deterministic context reveals that the tran-  
458 sient decrease in population size (resulting from the invasion of an incompatible  
459 *Wolbachia* strain into an uninfected insect population) is large enough to trigger  
460 extinction when the reproductive rate of the host species is relatively low. However,  
461 extinction is only observed in populations with higher reproductive rates for very  
462 strong Allee effects (Fig. 3A). However, the strength of the Allee effect required  
463 for extinction lowers for the introduction of an additional incompatible *Wolbachia*  
464 strain. The resulting insect extinction probability, estimated from simulations as-  
465 suming stochasticity, confirmed the interaction between the two processes. With-  
466 out CI, extinction probability is determined by population size and the strength  
467 of the component Allee effect (Fig 4A and 4D). Introducing infected individuals  
468 results in the extinction of populations that would have persisted otherwise (i.e.,  
469 populations above the Allee threshold), and further increasing incompatibility via  
470 the release of an additional *Wolbachia* strain increases the extinction domain by  
471 reducing the severity of Allee effect necessary to trigger extinction (Fig 4).

472 Nonetheless, with the exception of species with low reproductive rates, our  
473 model predicts that although Allee effects and CI combine to drive populations  
474 to extinction, even in surprisingly large populations, these extinctions occur for  
475 unrealistically severe Allee effects. For instance, after the introduction of two  
476 incompatible *Wolbachia* strains, extinction is expected for  $\theta/K \geq 0.4$ , that is, if

477 half of the females fail to mate in a population that is at 40% of the carrying  
478 capacity. Unfortunately, field estimations of mate-finding Allee effects in insects  
479 are rare, but it is probable that mating failures only occur at very low densities. For  
480 instance, in the Gypsy moth *Lymantria dispar*, mating failures occurred below a  
481 density (estimated via the rate of male captures on sex-pheromone traps) of about  
482 4 whereas the carrying capacity was estimated around 800 Tobin *et al.* (2007);  
483 Tobin, Onufrieva & Thorpe (2013), so that estimation of  $\theta/K$  in this species could  
484 be one or two orders of magnitude lower than that yielding extinction in our model.

485       Importantly, we show here that cytoplasmic incompatibility management may  
486 independently be an effective strategy for populations with low reproductive rates,  
487 and effective more generally when applied in conjunction with mating disruption.  
488 Regardless of reproductive rate, our simulations demonstrate that eradication can  
489 be obtained via the combined introduction of *Wolbachia*-infected individuals and  
490 sex pheromone sources into an insect population subject to pre-existing Allee ef-  
491 fect (Fig. 5). Two important conclusions can be drawn from this part of the  
492 study. First, this result is obtained with a set of realistic assumptions includ-  
493 ing relatively low intensity of Allee effect ( $\theta/K = 0.1$ ), the introduction of only  
494 two different *Wolbachia* strains, and conceivable application of mating disruption  
495 (density of pheromone sources at 10% of  $K$ ). Second, eradication is not restricted  
496 to small populations, but also applies to populations that have reached carrying  
497 capacity. Hence, via a specific focus on cytoplasmic incompatibility, our model  
498 supports conclusions from previous studies concerning the benefit of combining  
499 several population management tactics (Blackwood *et al.* (2012); Suckling *et al.*  
500 (2012)). Interestingly, *Wolbachia*-induced CI and mating disruption are fully com-  
501 patible, and other methods for population control such as parasitism or predation

502 by native natural enemies may also be complimentary .

503       There is a long and prolific body of research in population dynamics that  
504 focuses on understanding the mechanisms stabilizing species near their carrying  
505 capacities (e.g. Hassell & May (1973); Robert M. May (1978); Bernstein (2000)).  
506 More recently, global climate change and the biodiversity crisis, including popu-  
507 lation declines, extinctions, or biological invasions, points towards the increasing  
508 relevance of nonequilibrium ecology (Rohde (2006)) and the biology of small popu-  
509 lations (Fauvergue *et al.* (2012)). Transient dynamics are increasingly emphasized  
510 (Hastings (2004)) and sometimes considered in the specific context of population  
511 management (Ezard *et al.* (2010); Kidd & Amarasekare (2012)). The theoretical  
512 model developed in this study contributes to this perspective, and suggests that  
513 pest populations can be eradicated via the implementation of a cascade of intrinsic  
514 destabilizing processes. The introduction of individuals infected with *Wolbachia*  
515 strains incompatible to that of the resident pest population – few individuals, but  
516 numerous enough to exceed the *Wolbachia* invasion threshold – is akin to a but-  
517 terfly effect, that is, a small perturbation with dramatic consequences. As first  
518 highlighted by Dobson *et al.* (2002), cytotype replacement which occurs in the  
519 course a successful *Wolbachia* invasion yields a transient coexistence of incompati-  
520 ble infections within a host population, and as a consequence, a transient decrease  
521 in reproductive rate. Here, the transients only last a few generations and this per-  
522 turbation of the population’s microbiome the first step in a destabilizing cascade.  
523 We show here that the population can then be pushed toward a second step of  
524 destabilization, triggered by a mate-finding Allee effect that can be reinforced by  
525 the application of mating disruption, which potentially drives the population to  
526 extinction.

## 527 Acknowledgements

528 We thank Sylvain Charlat for helpful comments in earlier stages of this work.

## 529 References

530 Atyame, C.M., Cattel, J., Lebon, C., Flores, O., Dehecq, J.S., Weill, M., Gouagna,  
531 L.C. & Tortosa, P. (2015) Wolbachia-Based Population Control Strategy Target-  
532 ing *Culex quinquefasciatus* Mosquitoes Proves Efficient under Semi-Field Con-  
533 ditions. *Plos One*, **10**. Times Cited: 1.

534 Barton, N. & Turelli, M. (2011) Spatial waves of advance with bistable dynamics:  
535 cytoplasmic and genetic analogues of Allee effects. *The American Naturalist*,  
536 **178**, E48–E75.

537 Bernstein, C. (2000) Host-parasitoid models: the story of a successful failure.  
538 *Parasitoid population biology*, pp. 41–57.

539 Blackwood, J.C., Berec, L., Yamanaka, T., Epanchin-Niell, R.S., Hastings, A. &  
540 Liebhold, A.M. (2012) Bioeconomic synergy between tactics for insect eradica-  
541 tion in the presence of Allee effects. *Proceedings of the Royal Society B-Biological*  
542 *Sciences*, **279**, 2807–2815. Times Cited: 8.

543 Boukal, D.S. & Berec, L. (2009) Modelling mate-finding Allee effects and pop-  
544 ulations dynamics, with applications in pest control. *Population Ecology*, **51**,  
545 445–458. Times Cited: 2.

546 BOUKAL, D.S. & BEREK, L. (2002) Single-species Models of the Allee Effect:  
547 Extinction Boundaries, Sex Ratios and Mate Encounters. *Journal of Theoretical*

548 *Biology*, **218**, 375 – 394. ISSN 0022-5193.

549 URL <http://www.sciencedirect.com/science/article/pii/S0022519302930845>

550 Bourtzis, K. (2008) *Wolbachia-Based technologies for insect pest population control*,  
551 vol. 627 of *Advances in Experimental Medicine and Biology*, pp. 104–113. Times  
552 Cited: 46.

553 Braig, H.R., Guzman, H., Tesh, R.B. & Oneill, S.L. (1994) Replacement of the  
554 natural wolbachia symbiont of *Drosophila simulans* with a mosquito counterpart.  
555 *Nature*, **367**, 453–455. Times Cited: 109.

556 Caspari, E. & Watson, G. (1959) On the evolutionary importance of cytoplasmic  
557 sterility in mosquitoes. *Evolution*, **13**, 568–570.

558 Charlat, S., Calmet, C., Andrieu, O. & Mercot, H. (2005) Exploring the Evolution  
559 of Wolbachia Compatibility Types A Simulation Approach. *Genetics*, **170**, 495–  
560 507.

561 DeReDeC, A. & COuRCHamp, F. (2007) Importance of the Allee effect for rein-  
562 troductions. *Ecoscience*, **14**, 440–451.

563 Dobson, S.L., Fox, C.W. & Jiggins, F.M. (2002) The effect of Wolbachia-induced  
564 cytoplasmic incompatibility on host population size in natural and manipulated  
565 systems. *Proceedings of the Royal Society of London. Series B: Biological Sci-*  
566 *ences*, **269**, 437–445.

567 Ezard, T.H., Bullock, J.M., Dalglish, H.J., Millon, A., Pelletier, F., Ozgul, A. &  
568 Koons, D.N. (2010) Matrix models for a changeable world: the importance of

569 transient dynamics in population management. *Journal of Applied Ecology*, **47**,  
570 515–523.

571 Fauvergue, X. (2013) A review of mate-finding Allee effects in insects: from in-  
572 dividual behavior to population management. *Entomologia Experimentalis et*  
573 *Applicata*, **146**, 79–92. ISSN 1570-7458.

574 URL <http://dx.doi.org/10.1111/eea.12021>

575 Fauvergue, X., Malausa, J.C., Giuge, L. & Courchamp, F. (2007) Invading par-  
576 asitoids suffer no Allee effect: a manipulative field experiment. *Ecology*, **88**,  
577 2392–2403.

578 Fauvergue, X., Vercken, E., Malausa, T. & Hufbauer, R.A. (2012) The biology  
579 of small, introduced populations, with special reference to biological control.  
580 *Evolutionary applications*, **5**, 424–443.

581 Hancock, P.A., Sinkins, S.P. & Godfray, H.C.J. (2011) Population dynamic models  
582 of the spread of Wolbachia. *The American Naturalist*, **177**, 323–333.

583 Hassell, M.P. & May, R.M. (1973) Stability in insect host-parasite models. *The*  
584 *Journal of Animal Ecology*, pp. 693–726.

585 Hastings, A. (2004) Transients: the key to long-term ecological understanding?  
586 *Trends in Ecology & Evolution*, **19**, 39–45.

587 Hilgenboecker, K., Hammerstein, P., Schlattmann, P., Telschow, A. & Werren, J.H.  
588 (2008) How many species are infected with Wolbachia?—a statistical analysis of  
589 current data. *FEMS microbiology letters*, **281**, 215–220.

590 Hoffmann, A.A. & Turelli, M. (1997) *Cytoplasmic incompatibility in insects*. Influ-  
591 ential passengers: inherited microorganisms and arthropod reproduction. Ox-  
592 ford University Press, Oxford, UK. Miscellaneous.

593 Hoffmann, A.A., Turelli, M. & Harshman, L.G. (1990) Factors affecting the dis-  
594 tribution of cytoplasmic incompatibility in *Drosophila simulans*. *Genetics*, **126**,  
595 933–948.

596 Johnson, D.M., Liebhold, A.M., Tobin, P.C. & Bjornstad, O.N. (2006) Allee effects  
597 and pulsed invasion by the gypsy moth. *Nature*, **444**, 361–363.

598 Kidd, D. & Amarasekare, P. (2012) The role of transient dynamics in biological  
599 pest control: insights from a host–parasitoid community. *Journal of animal*  
600 *ecology*, **81**, 47–57.

601 Krawfsur, E.S. (1998) Sterile insect technique for suppressing and eradicating insect  
602 populations: 55 years and counting. *Journal of Agricultural Entomology*, **15**,  
603 303–317. Times Cited: 98.

604 Kramer, A.M., Dennis, B., Liebhold, A.M. & Drake, J.M. (2009) The evidence for  
605 Allee effects. *Population Ecology*, **51**, 341–354. Sp. Iss. SI.

606 Laven, H. (1967) Eradication of *Culex pipiens fatigans* through Cytoplasmic In-  
607 compatibility. *Nature*, **216**, 383–384. 10.1038/216383a0.

608 Liebhold, A. & Bascompte, J. (2003) The Allee effect, stochastic dynamics and  
609 the eradication of alien species. *Ecology Letters*, **6**, 133–140.

610 Liebhold, A.M., Halverson, J.A. & Elmes, G.A. (1992) Gypsy moth invasion in

611 North America - a quantitative analysis. *Journal of Biogeography*, **19**, 513–520.

612 Times Cited: 113.

613 Liebhold, A.M., Berez, L., Brockerhoff, E.G., Epanchin-Niell, R.S., Hastings, A.,  
614 Herms, D.A., Kean, J.M., McCullough, D.G., Suckling, D.M., Tobin, P.C. & Ya-  
615 manaka, T. (2016) Eradication of Invading Insect Populations: From Concepts  
616 to Applications. *Annual Review of Entomology*, **61**, 335–352. Times Cited: 1.

617 Liebhold, A.M. & Tobin, P.C. (2008) Population ecology of insect invasions and  
618 their management. *Annual Review of Entomology*, **53**, 387–408.

619 Losey, J.E. & Vaughan, M. (2006) The economic value of ecological services pro-  
620 vided by insects. *Bioscience*, **56**, 311–323. ISI Document Delivery No.: 032CC  
621 Times Cited: 38 Cited Reference Count: 58.

622 Melbourne, B.A. & Hastings, A. (2008) Extinction risk depends strongly on factors  
623 contributing to stochasticity. *Nature*, **454**, 100–103.

624 Price, P.W., Denno, R.F., Eubanks, M.D., Finke, D.L. & Kaplan, I. (2011) *Insect*  
625 *Ecology*. Cambridge University Press, Cambridge.

626 Robert M. May, R.M.A. (1978) Regulation and Stability of Host-Parasite Popu-  
627 lation Interactions: II. Destabilizing Processes. *Journal of Animal Ecology*, **47**,  
628 249–267. ISSN 00218790, 13652656.

629 URL <http://www.jstor.org/stable/3934>

630 Rohde, K. (2006) *Nonequilibrium ecology*. Cambridge University Press.

631 Schoener, T.W., Clobert, J., Legendre, S. & Spiller, D.A. (2003) Life-history mod-



632 els of extinction: a test with island spiders. *The American Naturalist*, **162**,  
633 558–573.

634 Sharov, A.A., Leonard, D., Liebhold, A.M., Roberts, E.A. & Dickerson, W. (2002)  
635 "Slow the Spread": A national program to contain the gypsy moth. *Journal of*  
636 *Forestry*, **100**, 30–35. Times Cited: 74.

637 Slatkin, M. & Smith, J.M. (1979) Models of coevolution. *Quarterly Review of*  
638 *Biology*, pp. 233–263.

639 Stephens, P.A. & Sutherland, W.J. (1999) Consequences of the Allee effect for  
640 behaviour, ecology and conservation. *Trends in ecology & evolution*, **14**, 401–  
641 405.

642 Stouthamer, R., Breeuwer, J.A.J. & Hurst, G.D.D. (1999) *Wolbachia pipientis*:  
643 Microbial manipulator of arthropod reproduction. *Annual Review of Microbiol-*  
644 *ogy*, **53**, 71–102. Times Cited: 674.

645 Suckling, D.M., Stringer, L.D., Stephens, A.E.A., Woods, B., Williams, D.G.,  
646 Baker, G. & El-Sayed, A.M. (2014) From integrated pest management to in-  
647 tegrated pest eradication: technologies and future needs. *Pest Management*  
648 *Science*, **70**, 179–189. Times Cited: 7.

649 Suckling, D.M., Tobin, P.C., McCullough, D.G. & Herms, D.A. (2012) Combining  
650 Tactics to Exploit Allee Effects for Eradication of Alien Insect Populations.  
651 *Journal of Economic Entomology*, **105**, 1–13. Times Cited: 9.

652 Taylor, C.M. & Hastings, A. (2005) Allee effects in biological invasions. *Ecology*  
653 *Letters*, **8**, 895–908.

- 654 Tobin, P.C., Onufrieva, K.S. & Thorpe, K.W. (2013) The relationship between  
655 male moth density and female mating success in invading populations of *Ly-*  
656 *mantria dispar*. *Entomologia Experimentalis Et Applicata*, **146**, 103–111. ISI  
657 Document Delivery No.: 052TY Times Cited: 1 Cited Reference Count: 67 To-  
658 bin, Patrick C. Onufrieva, Ksenia S. Thorpe, Kevin W. gypsy moth agency We  
659 thank the Gypsy Moth Mating Disruption Working Group for thoughtful discus-  
660 sions and support for much of the research conducted that enabled this analysis.  
661 We also would like to thank the countless number of field workers, industry rep-  
662 resentatives, collaborating scientists, and gypsy moth research funding agencies  
663 that also made this analysis possible. Wiley-blackwell Hoboken Si.
- 664 Tobin, P.C., Berec, L. & Liebhold, A.M. (2011) Exploiting Allee effects for man-  
665 aging biological invasions. *Ecology Letters*, **14**, 615–624. Times Cited: 0.
- 666 Tobin, P.C., Whitmire, S.L., Johnson, D.M., Bjornstad, O.N. & Liebhold, A.M.  
667 (2007) Invasion speed is affected by geographical variation in the strength of  
668 Allee effects. *Ecology Letters*, **10**, 36–43. Times Cited: 44.
- 669 Turelli, M. (1994) Evolution of incompatibility-inducing microbes and their hosts.  
670 *Evolution*, pp. 1500–1513.
- 671 Turelli, M. & Hoffmann, A.A. (1991) Rapid spread of an inherited incompatibility  
672 factor in California *Drosophila*. *Nature*, **353**, 440–442.
- 673 Wang, M.H. & Kot, M. (2001) Speeds of invasion in a model with strong or weak  
674 Allee effects. *Mathematical biosciences*, **171**, 83–97.
- 675 Yamanaka, T. & Liebhold, A.M. (2009) Spatially implicit approaches to under-

676 stand the manipulation of mating success for insect invasion management. *Pop-*  
677 *ulation Ecology*, **51**, 427–444. Times Cited: 2.

678 Zabalou, S., Riegler, M., Theodorakopoulou, M., Stauffer, C., Savakis, C. &  
679 Bourtzis, K. (2004) Wolbachia-induced cytoplasmic incompatibility as a means  
680 for insect pest population control. *Proceedings of the National Academy of Sci-*  
681 *ences of the United States of America*, **101**, 15042–15045. ISI Document Delivery  
682 No.: 865FT Times Cited: 138 Cited Reference Count: 34 Zabalou, S Riegler,  
683 M Theodorakopoulou, M Stauffer, C Savakis, C Bourtzis, K Natl acad sciences  
684 Washington.

Table 1. Unless otherwise stated, all figures use these parameter values.

| Parameter      | Description                                   | Value   | Source                               |
|----------------|-----------------------------------------------|---------|--------------------------------------|
| $N_0$          | initial population size                       | varies  |                                      |
| $m, m_e$       | <i>per capita</i> fecundity                   | 25      |                                      |
| $\sigma$       | standard deviation of fecundity               | 5       |                                      |
| $S_0$          | survivorship in absence of competition        | varies  |                                      |
| $\alpha$       | related to carrying capacity                  | 0.00002 | Dobson, Fox & Jiggins (2002)         |
| $\gamma$       | related to intraspecific competition          | 1       | Dobson, Fox & Jiggins (2002)         |
| $\mu_X, \mu_Y$ | maternal transmission failure                 | 0.03    | Dobson, Fox & Jiggins (2002)         |
| $F_X, F_Y$     | fecundity effect                              | 0.95    | Dobson, Fox & Jiggins (2002)         |
| $H_X, H_Y$     | survivorship of cytoplasmic incompatibilities | 0.05    | Charlat <i>et al.</i> (2005), varies |
| $\theta$       | strength of Allee effect                      | varies  |                                      |
| $P$            | number of false pheromones                    | varies  |                                      |

## References

- Charlat, S., Calmet, C., Andrieu, O. & Mercot, H. (2005) Exploring the Evolution of Wolbachia Compatibility Types A Simulation Approach. *Genetics*, **170**, 495–507.
- Dobson, S.L., Fox, C.W. & Jiggins, F.M. (2002) The effect of Wolbachia-induced cytoplasmic incompatibility on host population size in natural and manipulated systems. *Proceedings of the Royal Society of London. Series B: Biological Sciences*, **269**, 437–445.

## 688 Figure captions

689 **Figure 1.** (A) Verification that our model accurately predicts the invasion thresh-  
690 old as analytically determined in (Hoffman *et al.* 1990). Here, we ignore Allee  
691 effects, stochasticity, and assume  $P = 0$ . The blue line is the frequency of infected  
692 individuals at time  $t+1$  given the frequency at  $t$ ; equilibria occur when the blue and  
693 black lines intersect. The red dashed lines indicate the analytically predicted equi-  
694 libria. The smaller intersection is an unstable equilibrium that defines the invasion  
695 threshold: i.e. frequencies of *Wolbachia*-infected individuals above this threshold  
696 will successfully invade the population and approach the higher stable equilibrium.  
697 (B) demonstrates that Allee effects do not change the invasion threshold (dashed  
698 line is our model prediction, solid line is the analytically predicted equilibrium). In  
699 this figure, we use more extreme values related to CI to more clearly demonstrate  
700 the location of the invasion threshold (specifically,  $\mu_X = 0.2$ ,  $H_X = 0.1$ ).

701

702 **Figure 2.** (A) displays the probability of successful mating as determined by Allee  
703 effects as a function of population size. The black line corresponds to a weak Allee  
704 effect and the red corresponds to a strong Allee effect. The corresponding vertical  
705 lines indicate the population sizes at which half of the individuals successfully find  
706 a mate. (B) displays the reproductive rate between generations as a function of  
707 population size. Values above one correspond to population growth, and values be-  
708 low one correspond to decline. The colors have the same representation as in (A).  
709 The populations corresponding to the solid lines have no *Wolbachia*-infected indi-  
710 viduals, dashed lines are comprised of 10% infected individuals, and dash-dotted  
711 lines have 50% of the population infected.

712

713 **Figure 3.** Deterministic results. (A) single introduction; (B) two introductions.  
714 Plot displays the minimum population size relative to  $K$  over 50 generations as-  
715 suming that  $N_0 = K$ . The solid line has  $S_0 = 0.08$  (maximum reproductive rate  
716 of 2 in the absence of AE, as in Dobson, Fox & Jiggins (2002)), the dashed line  
717 has  $S_0 = 0.15$  (maximum reproductive rate of 3.75 in the absence of AE), dash-  
718 dotted line has  $S_0 = 0.2$  (maximum reproductive rate of 5 in the absence of AE),  
719 and dotted line has  $S_0 = 0.25$  (maximum reproductive rate of 6.25 in absence of  
720 AE). (C) assumes that  $\theta$  relative to  $K$  is fixed 0.1 (as displayed in A and B) with  
721  $S_0 = 0.15$ , and instead varies the number of pheromone sources  $P$  relative to  $K$ .  
722 The black line assumes there is no *Wolbachia*-infected individuals, dashed assumes  
723 a single release, and dash-dotted assumes a release of two cytotypes. In all plots,  
724 each release is created so the initial infection frequency of that cytotype is 10%.  
725 The first release is at generation one, and the second is at generation six.

726

727 **Figure 4.** Using  $S_0 = 0.15$ , the colors of each plot represent the extinction  
728 probability for a given parameter combination based on 500 realizations of the  
729 model. In each plot, the initial population size and the strength of the Allee effect  
730  $\theta$  relative to  $K$  are varied. Top row: demographic stochasticity only. Bottom  
731 row: both demographic and environmental stochasticity. First column: no intro-  
732 duction. Second column: introduction such that infection frequency is at 10%.  
733 Third column: two subsequent introductions. Gray line is the Allee threshold (i.e.  
734 initial populations below the gray line go to extinction in the deterministic model).

735

736 **Figure 5.** Using  $S_0 = 0.15$  and fixing  $\theta/K = 0.1$ , the colors of each plot represent

737 the extinction probability for a given parameter combination based on 500 real-  
738 izations of the model. In each plot, the initial population size and the number of  
739 pheromone sources ( $P$ ) relative to  $K$  are varied. Top row: demographic stochas-  
740 ticity only. Bottom row: both demographic and environmental stochasticity. First  
741 column: no introduction. Second column: introduction such that infection fre-  
742 quency is at 10%. Third column: two subsequent introductions.

743

Figure 1:

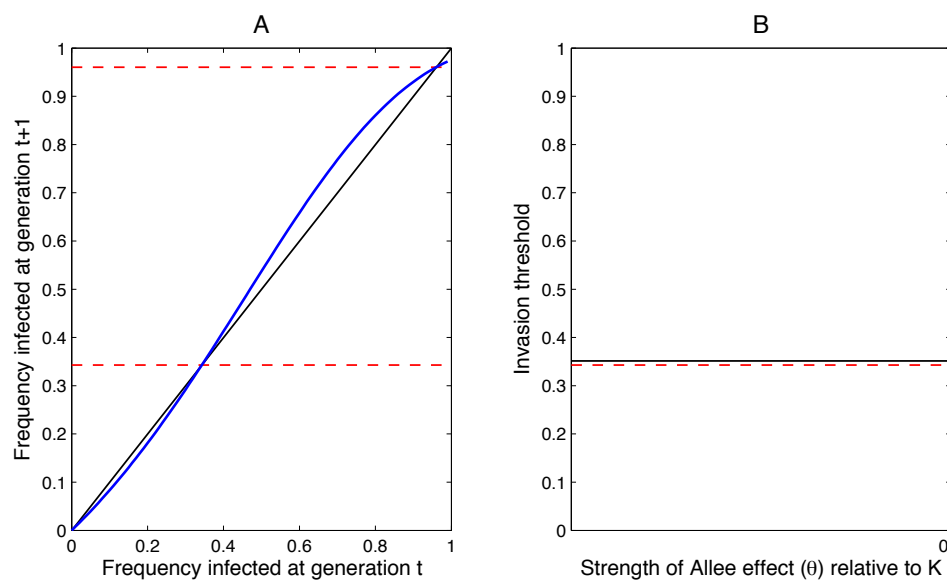



Figure 2:

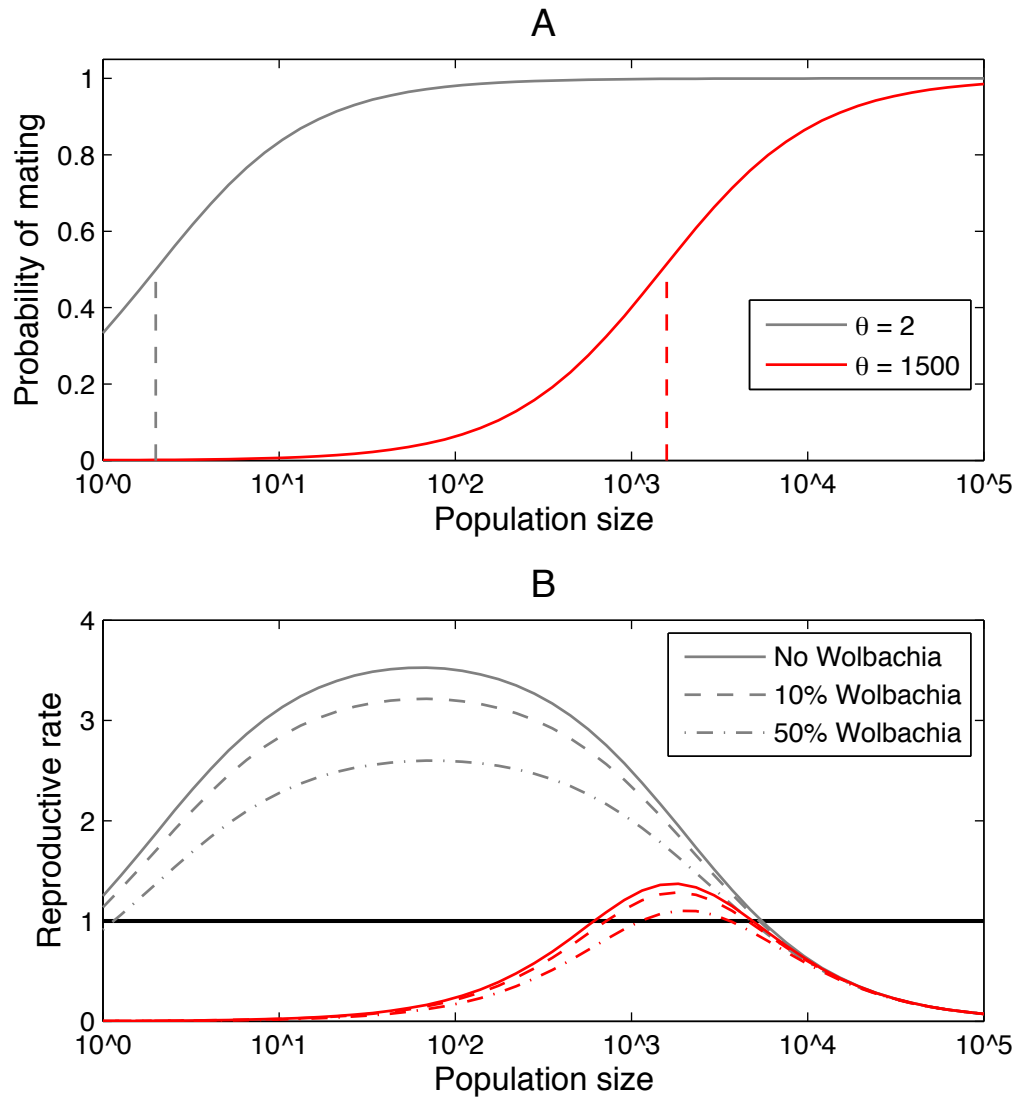

Figure 3:

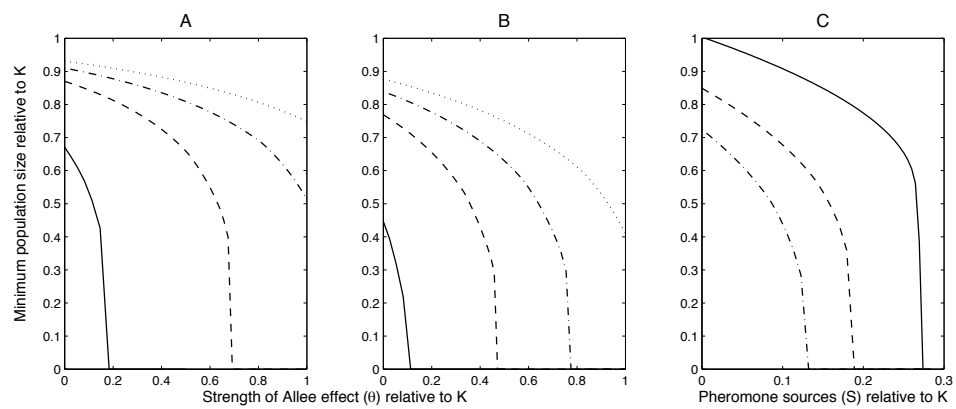

Figure 4:

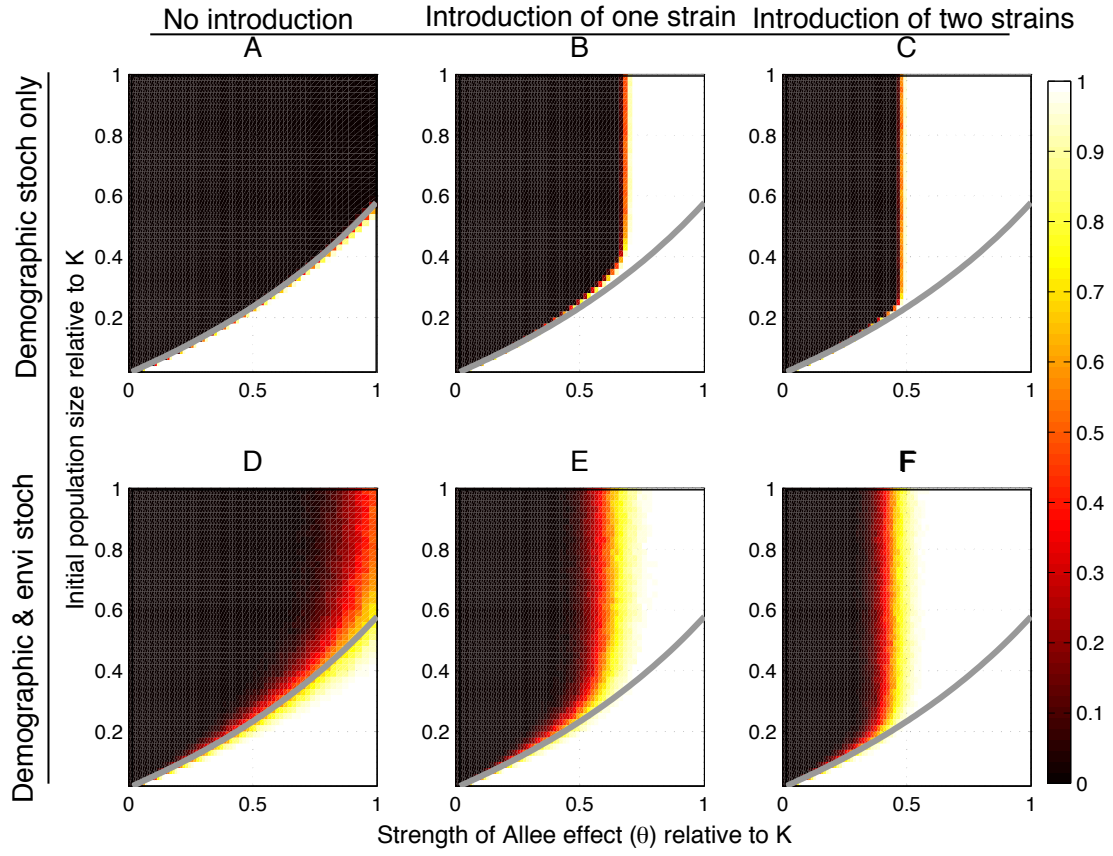

Figure 5:

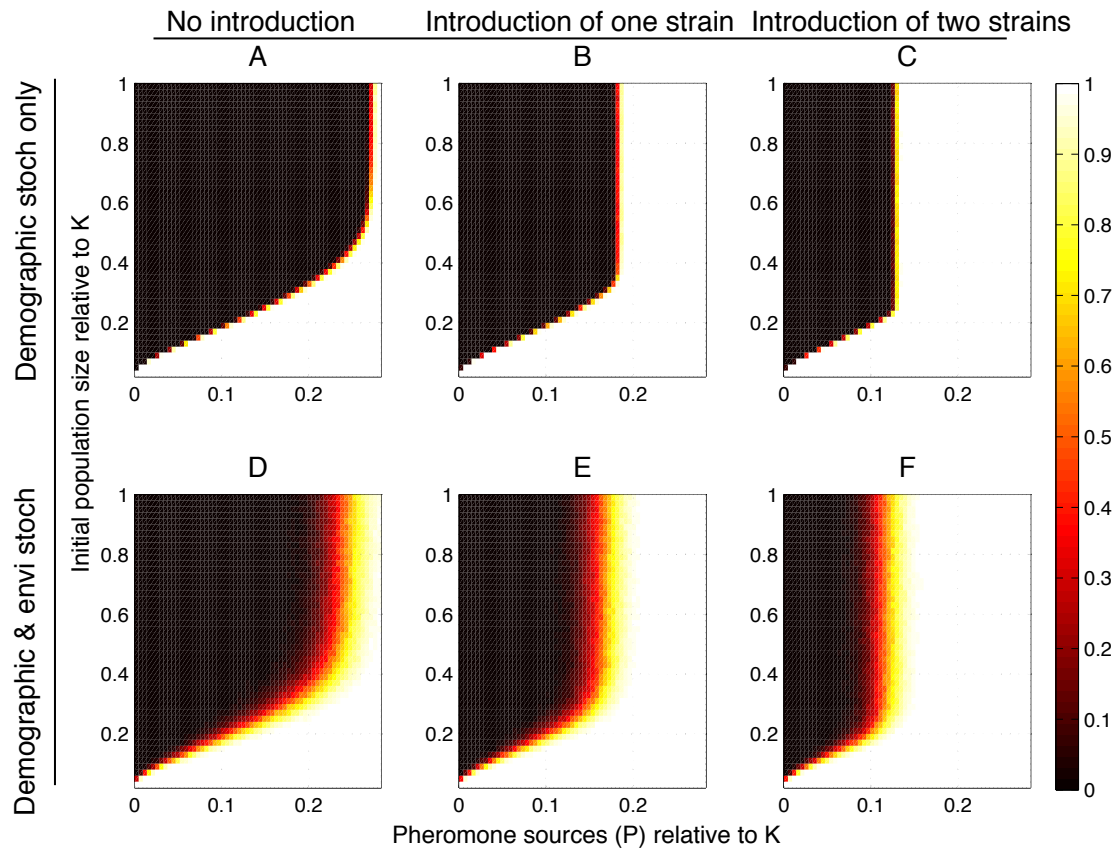

Source: http://biorxiv.org/content/10.1101/064774v1.full.pdf
